# Supplementary material for: (3α,5α)3-Hydroxypregnan-20-one (3α,5α-THP) Regulation of the HPA Axis in the Context of Different Stressors and Sex
Source: MDPI journal article supplement (doi:10.3390/biom12081134), 2022-08-18
Supplement: s1 [file s1]

**Table S1. Characteristics of primary antibodies used in immunoblotting.**

| <b>Target</b> | <b>Commercial supplier</b> | <b>Cat No #</b> | <b>Clonality</b> | <b>Host</b> | <b>Dilution</b> |
|---------------|----------------------------|-----------------|------------------|-------------|-----------------|
| CRF           | Immunostar                 | 20084           | Polyclonal       | Rabbit      | 1:1000          |
| CRFBP         | Santa Cruz Biotechnology   | Sc-365426       | Monoclonal       | Mouse       | 1:500           |
| CRFR1         | Novus Biologicals          | NBP1-00175      | Polyclonal       | Goat        | 1:1000          |
| GR            | Abcam                      | EPR19621        | Monoclonal       | Rabbit      | 1:1000          |
| POMC          | Novus Biologicals          | NB100-1533      | Polyclonal       | Goat        | 1:1000          |
| B-Actin       | Novus Biologicals          | NB600-501       | Monoclonal       | Mouse       | 1:5000          |
